# Supplementary material
Source: publisher figshare collection journal article supplement (https://tandf.figshare.com/ndownloader/files/22114476)
Supplement: Supplementary file 1 [file 22114476]

**Table S1.** Major threats to Italian vascular plants, categorized according to the IUCN threats classification scheme v. 3.2 (IUCN-2012b) and number of affected taxa for each threat. The number of species under major threats (in bold) is in some cases higher than the sum of subcategories, since for some species only general threats could be identified.

| **Major threat** | **N° of taxa** |
| --- | --- |
| 1. **Residential and commercial development** | **657** |
| 1.1 Housing and urban areas | 243 |
| 1.2 Commercial and industrial areas | 19 |
| 1.3 Tourism and recreational areas | 344 |
| 1. **Agriculture and aquaculture** | **657** |
| 2.1 Annual and perennial non-timber crops | 163 |
| 2.2 Wood and pulp plantations | 71 |
| 2.3 Livestock farming and ranching | 355 |
| 2.4 Marine and freshwater aquaculture | 4 |
| 1. **Energy production and mining** | **88** |
| 3.1 Oil and gas drilling | 1 |
| 3.2 Mining and quarrying | 54 |
| 3.3 Renewable energy | 9 |
| 1. **Transportation and service corridors** | **307** |
| 4.1 Roads and railroads | 271 |
| 4.2 Utility and service lines | 9 |
| 4.3 Shipping lanes | 1 |
| 4.4 Flight paths | 1 |
| 1. **Biological resource use** | **206** |
| 5.1 Hunting and collecting terrestrial animals | 1 |
| 5.2 Gathering terrestrial plants | 134 |
| 5.3 Logging and wood harvesting | 41 |
| 5.4 Fishing and harvesting aquatic resources | 0 |
| 1. **Human intrusions and disturbance** | **489** |
| 6.1 Recreational activities | 327 |
| 6.2 War, civil unrest and military exercises | 11 |
| 6.3 Work and other activities | 10 |
| 1. **Natural system modifications** | **938** |
| 7.1 Fire and fire suppression | 291 |
| 7.2 Dams and water management/use | 124 |
| 7.3 Other ecosystem modifications | 408 |
| 1. **Invasive and other problematic species, genes and diseases** | **174** |
| 8.1 Invasive non-native/ alien species/ diseases | 80 |
| 8.2 Problematic native species/ diseases | 46 |
| 8.3 Introduced genetic material | 1 |
| 8.4 Problematic species/ diseases of unknown origin | 1 |
| 8.5 Viral/ prion-induced diseases | 0 |
| 8.6 Diseases of unknown cause | 0 |
| 1. **Pollution** | **128** |
| 9.1 Domestic and urban waste water | 16 |
| 9.2 Industrial and military effluents | 6 |
| 9.3 Agricultural and forestry effluents | 81 |
| 9.4 Garbage and solid waste | 11 |
| 9.5 Air-borne pollutants | 0 |
| 9.6 Excess energy | 0 |
| 1. **Geological events** | **142** |
| 10.1 Volcanoes | 31 |
| 10.2 Earthquakes/Tsunamis | 3 |
| 10.3 Avalanches/ landslides | 95 |
| 1. **Climate change and severe weather** | **155** |
| 11.1 Habitat shifting and alteration | 56 |
| 11.2 Droughts | 33 |
| 11.3 Temperature extremes | 2 |
| 11.4 Storms and flooding | 13 |
| 11.5 Other impacts | 12 |
| 1. **Other options** | **1** |
| 12.1 Other threats | 1 |
